# Supplementary material
Source: publisher site journal article supplement (https://www.dovepress.com/article/286036)
Supplement: Supplementary file 1 [file get_supplementary_file.php]

**SUPPORTING INFORMATION**

**Table S1. List of Institutional Review Boards and Independent Ethics Committees**

| **Country** | **Name and address of IRB/IEC** |
| --- | --- |
| Bulgaria | Bulgarian Drug Agency |
|  | 8 Damyan Gruev Str. Sofia 1303 |
|  | Ethics Committee for Multicenter Trials, 5, “Sveta Nedelya” Square, Sofia 1000 |
| Prague | Fakultni nemocnice Hradec Kralove, Sokolska 581, Hradec Kralove 50005 |
|  | Eticka komise IKEM a FTNsP |
|  | Statni ustav pro kontrolu leciv,- Srobarova 48, Praha 10, 10041 |
| Hungary | Orszagos Gyogyszereszteti es Elelmezesegszsegugyi Intezet- Zrinyi u.3, H - 1372, Postafiok 450, Budapest 1051 Egeszsegugyi Tudomanyos Tanacs KlinikaiFarmakologiai Etikai Bizottsaga- Arany |
| Israel | Rambam Health Care Campus Ethics Committee- |
|  | Ministry of Health- 39 Yirmiyahu Street POB 1176, Clinical Trials Dept. Jerusalem, 9101002 |
| Israel | Hadassah MC Ethics Committee Ministry of Health- 39 Yirmiyahu Street POB 1176, Clinical Trials Dept. Jerusalem, |
|  | 9101002 |
| Israel | Kaplan MC Ethics Committee |
|  | Ministry of Health- 39 Yirmiyahu Street |
|  | POB 1176, Clinical Trials Dept. Jerusalem, 9101002 |
| Israel | Rabin MC Ethics Committee |
|  | Ministry of Health- 39 Yirmiyahu Street |
|  | POB 1176, Clinical Trials Dept. Jerusalem, 9101002 |
| Israel | Chaim Sheba MC Ethics Committee Ministry of Health- 39 Yirmiyahu Street POB 1176, Clinical Trials Dept. Jerusalem, 9101002 |
| Israel | Sapir MC, Meir Hospital Ethics committee Ministry of Health- 39 Yirmiyahu Street |
|  | POB 1176, Clinical Trials Dept. Jerusalem, 9101002 |
| Israel | Barzilai MC Ethics Committee |
|  | Ministry of Health- 39 Yirmiyahu Street POB 1176,Clinical Trials Dept. Jerusalem, 9101002 |
| Israel | The Lady Davis Carmel MC Ethics Committee Ministry of Health- 39 Yirmiyahu Street |
|  | POB 1176,Clinical Trials Dept. Jerusalem, 9101002 |
| Japan | Tokyo-Eki Center-Building Clinic IRB- 3-3-14, |
|  | Nihombashi, Chuo-Ku Tokya 103-0027 |
| Japan | Clinical Research Hospital Tokyo IRB- 3-87-4 Haramachi Shinjuku-ku, Tokya 162-0053 |
| Japan | Sekino Hospital IRB- Ikebukuro 3-28-3 Toshima-ku, Tokyo-to 171-0014 |
| Japan | Sanyakai Maebashi Hirosegawa Clinic IRB-2- |
|  | 10-9 Chiyodamachi, Maebashi-shi, Gunma 371-0022 |
| Japan | Fujisawa City Hospital IRB 2-6-1 Fujisawa, |
|  | Fujisawa-Shi, Kanagawa 251-8550 |
| Japan | NHO CRB- 2-5-21, |
|  | Higashigaoka, Meguro-ku, Tokyo 152-8621 |
| Japan | St. Luke's International Hospital IRB- |
|  | 9-1 Alashi-cho, Chuo-ku Tokyo 104-8560 |
| Japan | Hakuhokai Ako Central Hospital IRB- |
|  | 52-6 Somon-cho, Ako-shiHyogo 678-0241 |
| Japan | NHO CRB- 2-5-21, |
|  | Higashigaoka, Meguro-ku Tokyo 152-8621 |
| Japan | Saitama Red Cross Hospital IRB- 8-3-33, Kamiochiai, Chuo- |
|  | ku, Saitama-shi, Saitama 338-8553 |
| Japan | KYOSOKAI AMC Nishiumeda Clinic IRB 3-3-45, Umeda |
|  | Osaka-shi, Osaka 53-0001 |
| Japan | Yokkaichi Municipal Hospital IRB |
|  | 2-2- |
|  | 37, Shibata |
|  | Yokkaichi-shi, Mie 510-5267 |
| Japan | Sapporo-Kosei General Hospital IRB 8-5 Kita 3-jo Higashi |
|  | Sapporo-shi Hokkaido 060-0033 |
| Japan | IRB of Iryohoujinsyadan Sugiuraiin 4-4-16-301 |
|  | Kawasaki-shi, Saitama 332-001 |
| Japan | Kurume University IRB 67, Asahimachi, |
|  | Kurume-shi, Fukuoka 830-0011 |
| Latvia | State Agency of Medicines of Latvia, Jersikas street 15, Riga, LV1003 |
|  | Ethics Committee for Clinical Trials of |
|  | Medicinal Products, Aizkraukles street 21 – 113, Riga LV1006 |
| Latvia | Ethics Committee for Clinical Trials of |
|  | Medicinal Products, Aizkraukles street 21 – 113, Riga LV1006 |
| Lithuania | State Medicines Control Agency, Zirmunu g. 139A, Vilnius LT-09120 |
|  | Lithuanian Bioethics Committee , Vilniaus g. 16, Vilnius, LT-01402 |
| Serbia | Ethics Committee of Clinical Center Zvezdara- Dimitrija Tucovica 161, Belgrade 11000 |
|  | Medicines and Medical Devices agency of |
|  | Serbia-458, Vojvode Stepe Street Belgrade, 11221 |
| Serbia | Ethics Committee of Clinical Center Kragujevac- Zmaj Jovina 30, Kragujevac 34000 Medicines and Medical Devices agency of Serbia-458, Vojvode Stepe Street Belgrade, 11221 |
| Serbia | Ethics Committee of Institute for Pulmonary Diseases of Vojvodina- Put dr Goldmana 4 Sremska Kamenica Vojvodina 21204 Medicines and Medical Devices agency of Serbia-458, Vojvode Stepe Street Belgrade, 11221 |
| Slovakia | Statny ustav pre kontrolu lieciv, Kvetna 11, Bratislava 82508 |
|  | Eticka komisia Nitrianskeho samospravneho kraja, Razusova 2A Nitra 94901 |
| Slovakia | Statny ustav pre kontrolu lieciv, Kvetna 11, Eticka komisia Nitrianskeho samospravneho kraja, Razusova 2A Nitra 94901 |
|  | Eticka komisia Trencianskeho samospravneho |
|  | kraja- K dolnej stanici 7282/20A Trencin, 91101 |
| South Africa | Pharma Ethics |
|  | 123 Amcor Road Lyttlelon Manor, South Africa 0157 |
|  | MCC - Medicines Control Council (South Africa) 42 Andries Street Pretoria, Gauteng 0001 |
| Ukraine | State Expert Center of the Ministry of Health of Ukraine 40, Ushynskogo St. Kyiv 03151 |
|  | The ethics Commission at State Inst |
|  | F.H Yanovskyi Nat’l Inst. of Phthisiatry & Pumonology of NAMS of Ukraine- |
|  | 10, Amosova St. Kyiv, Uraine 03680 |
| Ukraine | State Expert Center of the Ministry of Health of Ukraine |
|  | 40, Ushynskogo St. Kyiv 03151 |
|  | LEC Communal Institution Zaporizhzhia Regional Clinical Hospital – 10, Orikhhivske Shose St. Zaporizhzhia, Ukraine 69600 |
| Ukraine | The Ethics Commission at Communal Inst. Dnipropetrovsk City Clinical Hospital #6 of Dnipropetrovsk Regional Council- 13, |
|  | Batumska St. Dnipropetrovsk, Ukraine 49074 |
| Ukraine | State Expert Center of the Ministry of Health of Ukraine 40, Ushynskogo St. Kyiv 03151 |
|  | LEC SI Railway Hospital of State Enterprise |
|  | Odesa Railway – 3a, Heroiiv Prykordonnykiv St. Odesa, Ukraine 65010 |
| Ukraine | State Expert Center of the Ministry of Health of Ukraine |
|  | 40, Ushynskogo St. Kyiv 03151 The Ethics Commission at Kyiv City |
|  | Tuberculosis Hosp.#1 with Dispensary Dept- 121/3, Kharkivske St. Kyiv, Ukraine 02091 |
| Ukraine | The Ethics Commission at Regional Phthisiopulmonological Center- |
|  | 17 Franka St. |
|  | Ivano-Frankivsk, Ukraine 76018 |
| Ukraine | LEC LLC Treatment and Diagnostic Center ADONIS Plus |
|  | 8b, Raisy |
|  | Okipnoi St. Kyiv, Ukraine, 02002 |
| Ukraine | LEC City Hospital #1 4 Volodarskoho St. Mykolaiv, Ukraine, 54003 |
| Ukraine | LEC City Clinical Hospital # 1 96, Khmelnyske Shose |
|  | St. Vinnytsia, Ukraine 21029 |
| Ukraine | LEC Poltava Regional Clinical Antitubercular Dispensary- I-V, Kyivsky Shose St. vil. |
|  | Suprunivka, Poltava district 36040 |
| USA | Copernicus Group IRB, 1 Triangle Drive, Suite 100, Durham, NC 27713 |
| USA | Mayo Clinic IRB – Rochester- 200 First Street, |
| USA | SW Rochester, MN 55905 |
| USA | Johns Hopkins University IRB- 1620 McElderry St,, Reed Hall B-130 Baltimore, MD 21205 |
| USA | NYU School of Medicine IRB-462 First Avenue. New York, NY 10016 |
| USA | Program for the Protection of Human Subjects, Icahn School of Medicine at Mount Sinai |
|  | Medical Center- One Gustave L. Levy Place, Box 1081 New York, NY 10029 |

**Abbreviations:** IEC, independent ethics committee; IRB, Institutional Review Board

**Table S2** List of Allergens Evaluated in the Anti-IgE FEIA Test

*Alternaria alternata*

*Aspergillus fumigatus*

Bermuda grass

Birch

Cat dander

*Cladosporium herbarum*

Cockroach

Common ragweed

*Dermatophagoides farina*

*Dermatophagoides pteronyssinus*

Dog dander

Japanese cedar

Johnson grass

*Penicillium chrysogenum*

Timothy grass

**Abbreviations:** FEIA, fluoro-enzyme immunoassay; IgE, immunoglobulin E.

**Table S3** History of Exacerbations at Baseline According to Baseline Blood Eosinophil Count or Atopic Asthma Status*

|  | Placebo | | Tezepelumab  210 mg Q4W | | Pooled tezepelumab | |
| --- | --- | --- | --- | --- | --- | --- |
| Blood eosinophil count (cells/µL) | <300  (n=73) | ≥300  (n=65) | <300  (n=70) | ≥300  (n=67) | <300  (n=214) | ≥300  (n=198) |
| History of prior exacerbations, n (%) |  |  |  |  |  |  |
| 1 or 2 | 59 (80.8) | 51 (78.5) | 55 (78.6) | 50 (74.6) | 179 (83.6) | 152 (76.8) |
| ≥3 | 14 (19.2) | 14 (21.5) | 15 (21.4) | 17 (25.4) | 35 (16.4) | 46 (23.2) |
| Allergic asthma status | Atopic  (n=80) | Non-atopic  (n=50) | Atopic  (n=77) | Non-atopic  (n=50) | Atopic  (n=216) | Non-atopic  (n=168) |
| History of prior exacerbations, n (%) |  |  |  |  |  |  |
| 1 or 2 | 66 (82.5) | 37 (74.0) | 59 (76.6) | 37 (74.0) | 175 (81.0) | 135 (80.4) |
| ≥3 | 14 (17.5) | 13 (26.0) | 18 (23.4) | 13 (26.0) | 41 (19.0) | 33 (19.6) |

**Note:** *Atopic status was defined by a positive FEIA test for IgE-mediated asthma. In addition to those patients with a positive or negative FEIA test result, a number of patients had no atopic status recorded (placebo, n=8; tezepelumab 210 mg Q4W, n=10; pooled tezepelumab, n=28).

**Abbreviations:** FEIA, fluoro-enzyme immunoassay; IgE, immunoglobulin E; Q4W, every 4 weeks.

**Table S4** Comparison of AAER in the Tezepelumab and Placebo Groups During each Season

| Season | Rate of exacerbations (95% CI) | | | Rate ratio (95% CI) vs placebo | | Nominal P-value vs placebo | |
| --- | --- | --- | --- | --- | --- | --- | --- |
| **Placebo** | **Tezepelumab 210 mg Q4W** | **Pooled tezepelumab** | **Tezepelumab**  **210 mg Q4W** | **Pooled tezepelumab** | **Tezepelumab 210 mg Q4W** | **Pooled tezepelumab** |
| Winter | 0.87  (0.58, 1.24) | 0.32  (0.15, 0.58) | 0.33  (0.23, 0.47) | 0.36 (0.17, 0.78) | 0.37 (0.22, 0.63) | 0.009 | <0.001 |
| Spring | 0.62  (0.39, 0.95) | 0.13  (0.03, 0.33) | 0.19  (0.11, 0.30) | 0.20 (0.07, 0.59) | 0.30 (0.15, 0.58) | 0.004 | <0.001 |
| Summer | 0.67  (0.47, 1.08) | 0.12  (0.03, 0.32) | 0.16  (0.09, 0.26) | 0.18 (0.06, 0.52) | 0.23 (0.12, 0.44) | 0.002 | <0.001 |
| Fall | 0.73  (0.47, 1.08) | 0.25  (0.11, 0.49) | 0.27  (0.18, 0.40) | 0.33 (0.14, 0.79) | 0.37 (0.21, 0.66) | 0.012 | <0.001 |

**Abbreviations:** AAER, annualized asthma exacerbation rate; CI, confidence interval.

**Table S5** Number of Patients with Asthma Exacerbations and Total Days of Exacerbations by Season, According to Baseline Blood Eosinophil Count (cells/µL)

|  | Placebo | | Tezepelumab  210 mg Q4W | | Pooled tezepelumab | |
| --- | --- | --- | --- | --- | --- | --- |
|  | <300  (n=73) | ≥300  (n=65) | <300  (n=70) | ≥300  (n=67) | <300  (n=214) | ≥300  (n=198) |
| Number of patients with at least one exacerbation during season, n (%) |  |  |  |  |  |  |
| Winter | 10 (14.1) (n=71) | 13 (20.0)  (n=65) | 5 (7.7) (n=65) | 4 (6.2)  (n=65) | 18 (9.0)  (n=200) | 13 (6.7)  (n=194) |
| Spring | 7 (9.7)  (n=72) | 11 (16.9)  (n=65) | 0 (n=63) | 4 (6.1)  (n=66) | 8 (4.0)  (n=200) | 8 (4.1)  (n=195) |
| Summer | 10 (14.1)  (n=71) | 11 (16.9) (n=65) | 2 (3.0) (n=66) | 2 (3.1) (n=65) | 9 (4.3)  (n=207) | 7 (3.6) (n=196) |
| Fall | 8 (11.0) (n=73) | 12 (18.5)  (n=65) | 4 (5.9) (n=68) | 3 (4.6)  (n=64) | 14 (6.7) (n=208) | 12 (6.1) (n=196) |
| Number of patients with 0, 1 or ≥2 exacerbations during season, n (%) |  |  |  |  |  |  |
| Winter |  |  |  |  |  |  |
| n | 71 | 65 | 65 | 65 | 200 | 194 |
| 0 | 61 (85.9) | 52 (80.0) | 60 (92.3) | 61 (93.8) | 182 (91.0) | 181 (93.3) |
| 1 | 8 (11.3) | 10 (15.4) | 5 (7.7) | 3 (4.6) | 18 (9.0) | 12 (6.2) |
| ≥2 | 2 (2.8) | 3 (4.6) | 0 | 1 (1.5) | 0 | 1 (0.5) |
| Spring |  |  |  |  |  |  |
| n | 72 | 65 | 63 | 66 | 200 | 195 |
| 0 | 65 (90.3) | 54 (83.1) | 63 (100.0) | 62 (93.9) | 192 (96.0) | 187 (95.9) |
| 1 | 6 (8.3) | 9 (13.8) | 0 | 4 (6.1) | 7 (3.5) | 7 (3.6) |
| ≥2 | 1 (1.4) | 2 (3.1) | 0 | 0 | 1 (0.5) | 1 (0.5) |
| Summer |  |  |  |  |  |  |
| n | 71 | 65 | 66 | 65 | 207 | 196 |
| 0 | 61 (85.9) | 54 (83.1) | 64 (97.0) | 63 (96.9) | 198 (95.7) | 189 (96.4) |
| 1 | 9 (12.7) | 10 (15.4) | 2 (3.0) | 2 (3.1) | 9 (4.3) | 7 (3.6) |
| ≥2 | 1 (1.4) | 1 (1.5) | 0 | 0 | 0 | 0 |
| Fall |  |  |  |  |  |  |
| n | 73 | 65 | 68 | 65 | 208 | 196 |
| 0 | 65 (89.0) | 53 (81.5) | 64 (94.1) | 62 (95.4) | 194 (93.3) | 184 (93.9) |
| 1 | 7 (9.6) | 9 (13.8) | 4 (5.9) | 2 (3.1) | 14 (6.7) | 11 (5.6) |
| ≥2 | 1 (1.4) | 3 (4.6) | 0 | 1 (1.5) | 0 | 1 (0.5) |
|  |  |  |  |  |  |  |
| Total days of exacerbations per patient during season, mean (SD) |  |  |  |  |  |  |
| Winter | 1.5 (4.66)  (n=71) | 3.5 (9.11)  (n=65) | 0.5 (2.07)  (n=65) | 0.7 (3.42)  (n=65) | 0.9 (3.27)  (n=200) | 0.9 (4.15)  (n=194) |
| Spring | 1.2 (4.12)  (n=72) | 2.0 (5.67)  (n=65) | 0.1 (0.56)  (n=66) | 0.6 (2.69)  (n=66) | 0.5 (2.90)  (n=200) | 0.5 (2.66)  (n=195) |
| Summer | 1.9 (5.93)  (n=71) | 1.8 (5.10)  (n=65) | 0.2 (1.62)  (n=66) | 0.2 (1.56)  (n=65) | 0.5 (2.31)  (n=207) | 0.5 (3.58)  (n=196) |
| Fall | 1.8 (6.45)  (n=73) | 2.9 (8.25)  (n=65) | 0.7 (2.59)  (n=68) | 0.7 (3.72)  (n=64) | 0.8 (3.44)  (n=208) | 0.7 (3.16)  (n=196) |

**Note:** Data are descriptive and no formal statistical analyses were performed owing to small subgroup sizes.

**Abbreviations:** Q4W, every 4 weeks; SD, standard deviation.

**Table S6** Number of Patients with Asthma Exacerbations and Total Days of Exacerbations by Season, According to Baseline Atopic Asthma Status*

|  | Placebo | | | Tezepelumab  210 mg Q4W | | | | Pooled tezepelumab | | | |
| --- | --- | --- | --- | --- | --- | --- | --- | --- | --- | --- | --- |
|  | Atopic  (n=80) | Non-atopic  (n=50) | | Atopic  (n=77) | | Non-atopic  (n=50) | | Atopic  (n=216) | | Non-atopic  (n=168) | |
| Number of patients with at least one exacerbation during season, n (%) |  |  | |  | |  | |  | |  | |
| Winter | 12 (15.2)  (n=79) | 8 (16.3)  (n=49) | | 3 (4.2)  (n=72) | | 6 (12.5)  (n=48) | | 13 (6.4)  (n=204) | | 15 (9.3)  (n=162) | |
| Spring | 9 (11.4)  (n=79) | 6 (12.0)  (n=50) | | 2 (2.8)  (n=72) | | 1 (2.1)  (n=47) | | 9 (4.3)  (n=209) | | 4 (2.5)  (n=158) | |
| Summer | 11 (14.1) (n=78) | 10 (20.0)  (n=50) | | 0  (n=73) | | 4 (8.3)  (n=48) | | 4 (1.9)  (n=211) | | 10 (6.1)  (n=164) | |
| Fall | 14 (17.5) (n=80) | 5 (10.0)  (n=50) | | 4 (5.3)  (n=75) | | 1 (2.1)  (n=48) | | 14 (6.6)  (n=211) | | 7 (4.2)  (n=165) | |
| Number of patients with 0, 1 or ≥2 exacerbations during season, n (%) |  |  | |  | |  | |  | |  | |
| Winter |  |  | |  | |  | |  | |  | |
| n | 79 | 49 | | 72 | | 48 | | 204 | | 162 | |
| 0 | 67 (84.8) | 41 (83.7) | | 69 (95.8) | | 42 (87.5) | | 191 (93.6) | | 147 (90.7) | |
| 1 | 8 (10.1) | 7 (14.3) | | 2 (2.8) | | 6 (12.5) | | 12 (5.9) | | 15 (9.3) | |
| ≥2 | 4 (5.1) | 1 (2.0) | | 1 (1.4) | | 0 | | 1 (0.5) | | 0 | |
| Spring |  |  | |  | |  | |  | |  | |
| n | 79 | 50 | | 72 | | 47 | | 209 | | 158 | |
| 0 | 70 (88.6) | 44 (88.0) | | 70 (97.2) | | 46 (97.9) | | 200 (95.7) | | 154 (97.5) | |
| 1 | 7 (8.9) | 5 (10.0) | | 2 (2.8) | | 1 (2.1) | | 8 (3.8) | | 3 (1.9) | |
| ≥2 | 2 (2.5) | 1 (2.0) | | 0 | | 0 | | 1 (0.5) | | 1 (0.6) | |
| Summer |  |  | |  | |  | |  | |  | |
| n | 78 | 50 | | 73 | | 48 | | 211 | | 164 | |
| 0 | 67 (85.9) | 40 (80.0) | | 73 (100.0) | | 44 (91.7) | | 207 (98.1) | | 154 (93.9) | |
| 1 | 10 (12.8) | 9 (18.0) | | 0 | | 4 (8.3) | | 4 (1.9) | | 10 (6.1) | |
| ≥2 | 1 (1.3) | 1 (2.0) | | 0 | | 0 | | 0 | | 0 | |
| Fall |  |  | |  | |  | |  | |  | |
| n | 80 | 50 | | 75 | | 48 | | 211 | | 165 | |
| 0 | 66 (82.5) | 45 (90.0) | | 71 (94.7) | | 47 (97.9) | | 197 (93.4) | | 158 (95.8) | |
| 1 | 10 (12.5) | 5 (10.0) | | 4 (5.3) | | 1 (2.1) | | 14 (6.6) | | 7 (4.2) | |
| ≥2 | 4 (5.0) | 0 | | 0 | | 0 | | 0 | | 0 | |
|  |  | |  | |  | |  | |  | |  |
| Total days of exacerbations per patient during season, mean (SD) |  | |  | |  | |  | |  | |  |
| Winter | 2.5 (6.66)  (n=79) | | 2.4 (8.40)  (n=49) | | 0.6 (3.22)  (n=72) | | 0.8 (2.46)  (n=48) | | 0.8 (3.33)  (n=204) | | 1.0 (4.20)  (n=162) |
| Spring | 1.5 (4.86)  (n=79) | | 1.6 (5.13)  (n=50) | | 0.2 (1.37)  (n=72) | | 0.5 (2.69)  (n=47) | | 0.5 (2.78)  (n=209) | | 0.4 (2.83)  (n=158) |
| Summer | 1.8 (5.55)  (n=78) | | 2.4 (5.91)  (n=50) | | 0  (n=73) | | 0.6 (2.58)  (n=48) | | 0.4 (3.34)  (n=211) | | 0.6 (2.61)  (n=164) |
| Fall | 2.7 (8.11)  (n=80) | | 1.7 (6.10)  (n=50) | | 0.5 (2.10)  (n=75) | | 0.3 (1.73)  (n=48) | | 0.7 (3.27)  (n=211) | | 0.5 (2.60)  (n=165) |

**Note:** Data are descriptive and no formal statistical analyses were performed owing to small subgroup sizes.

*Atopic status was defined by a positive FEIA test for IgE-mediated asthma. In addition to those patients with a positive or negative FEIA test result, a number of patients had no atopic status recorded (placebo, n=8; tezepelumab 210 mg Q4W, n=10; pooled tezepelumab, n=28).

**Abbreviations:** FEIA, fluoro-enzyme immunoassay; IgE, immunoglobulin E; Q4W, every 4 weeks; SD, standard deviation.
